# Supplementary material
Source: publisher figshare collection journal article supplement (https://acs.figshare.com/ndownloader/files/7634155)
Supplement: Supplementary file 1 [file 7634155]

## **Supporting Information for**

# **Efficient Conformational Search Based on Structural Dissimilarity Sampling: Applications for Reproducing Structural Transitions of Proteins**

Ryuhei Harada<sup>\*a</sup> and Yasuteru Shigeta<sup>\*a</sup>

*<sup>a</sup>Center for Computational Sciences, University of Tsukuba, Tennodai, 1-1-1, Tsukuba, Ibaraki, 305-8577,  
Japan*

Corresponding authors: Ryuhei Harada, Yasuteru Shigeta

E-mails: [ryuhei@ccs.tsukuba.ac.jp](mailto:ryuhei@ccs.tsukuba.ac.jp), [shigeta@ccs.tsukuba.ac.jp](mailto:shigeta@ccs.tsukuba.ac.jp)

### Supporting Information (Figure S1)

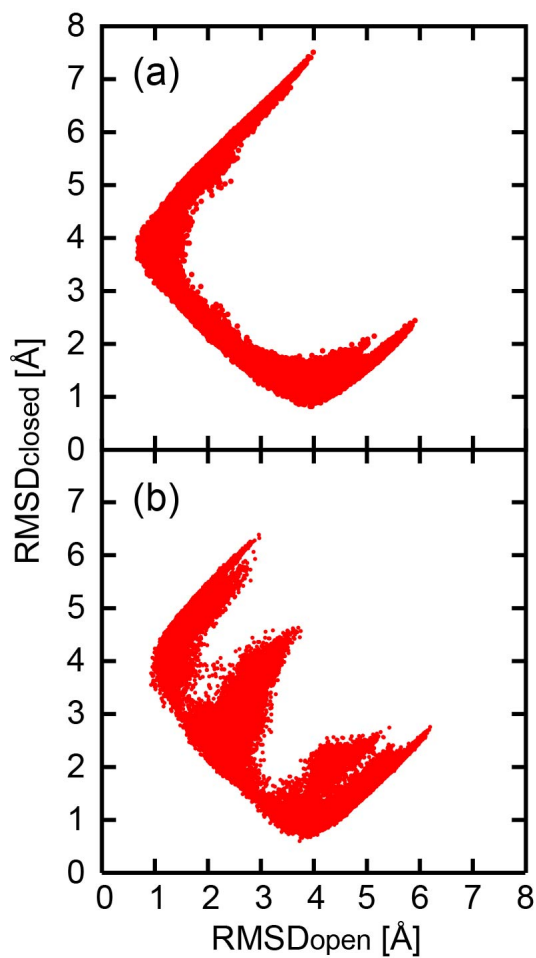

Projections of all the trajectories generated by the trials of SDS ( $N_{\text{initial}} = 100$  and  $\text{DOF} = 30$  PCs), starting from (a) the open and (b) closed states of MBP during the 50 cycles. Each snapshot was projected onto the two-dimensional conformational subspace spanned by  $C_{\alpha}$  RMSD measured from the open and closed forms, ( $\text{RMSD}_{\text{open}}$ ,  $\text{RMSD}_{\text{closed}}$ ).

## Supporting Information (Figure S2)

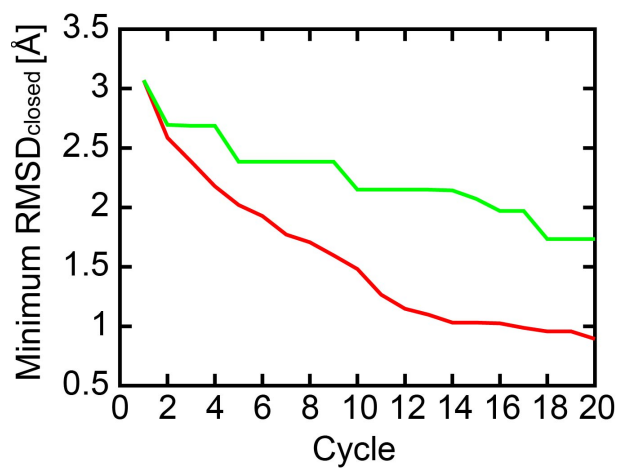

(red) Profile of the minimum  $C_\alpha$  RMSD measured from the closed form of MBP,  $\text{RMSD}_{\text{closed}}$ , for the trial ( $N_{\text{initial}} = 100$  and  $\text{DOF} = 30$  PCs). (green) Profile of the minimum  $\text{RMSD}_{\text{closed}}$  for the trial ( $N_{\text{initial}} = 100$ ) using the inner products defined by the atomic configuration ( $C_\alpha$  coordinates).

### Supporting Information (Figure S3)

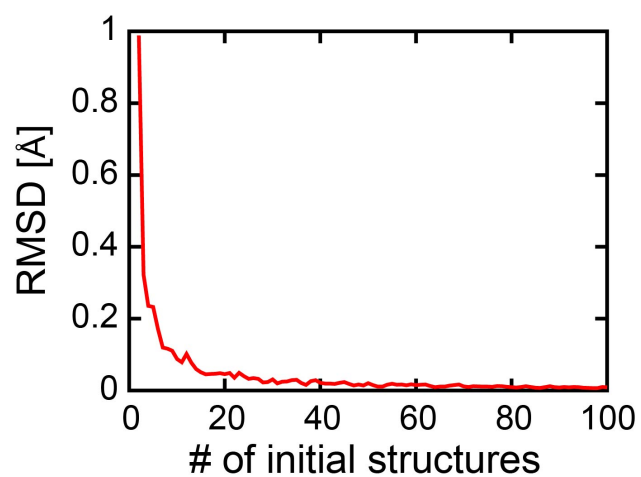

Profile of  $C_{\alpha}$  RMSD among average structures constructed by a different set of initial structures selected at the 1<sup>st</sup> cycle for the trial of SDS starting from the open form of MBP ( $N_{\text{initial}} = 100$  and DOF = 30 PCs).

# Supporting Information (Figure S4)

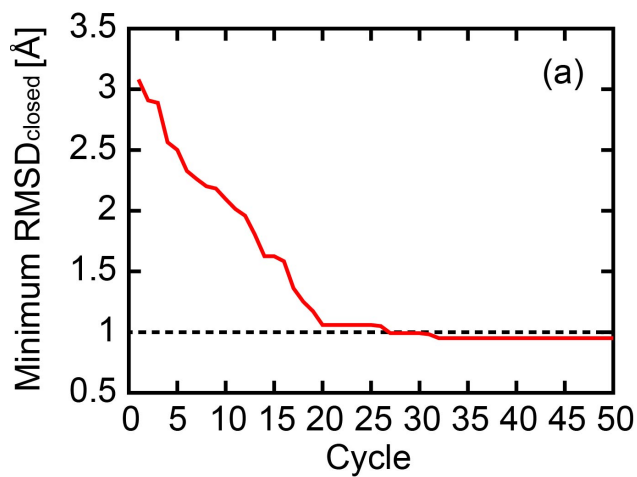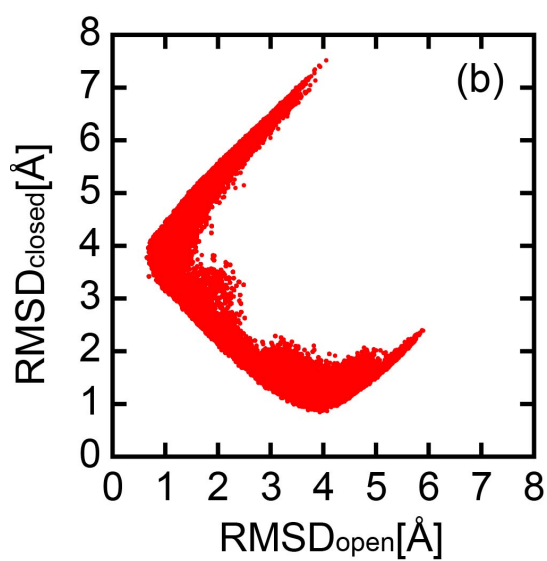

(a) Profile of the minimum  $C_\alpha$  RMSD measured from the closed form of MBP ( $\text{RMSD}_{\text{closed}}$ ) for the trial of SDS ( $N_{\text{initial}} = 50$  and  $\text{DOF} = 30$  PCs). (b) Projections of all the trajectories of the trial during the 50 cycles.

## Supporting Information (Figure S5)

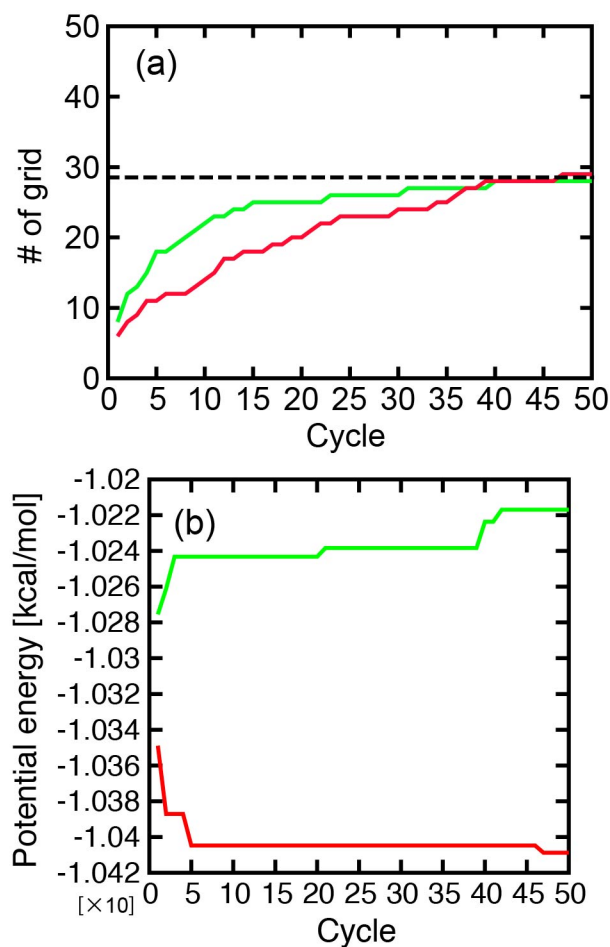

(a) Profile of convergence of conformational resampling by SDS. The grids were defined as finite cells in one-dimensional conformational subspace spanned by  $\text{RMSD}_{\text{closed}}$ , and total numbers of the grids were monitored. Profiles for the trial of SDS starting from the (red) open and (green) closed of forms of MBP ( $N_{\text{initial}} = 100$  and  $\text{DOF} = 30$  PCs). The dashed line represents convergence of conformational resampling. (b) Profiles of the (red) minimum and (green) maximum potential energies for the trial of SDS starting from the open form of MBP ( $N_{\text{initial}} = 100$  and  $\text{DOF} = 30$  PCs).

## Supporting Information (Figure S6)

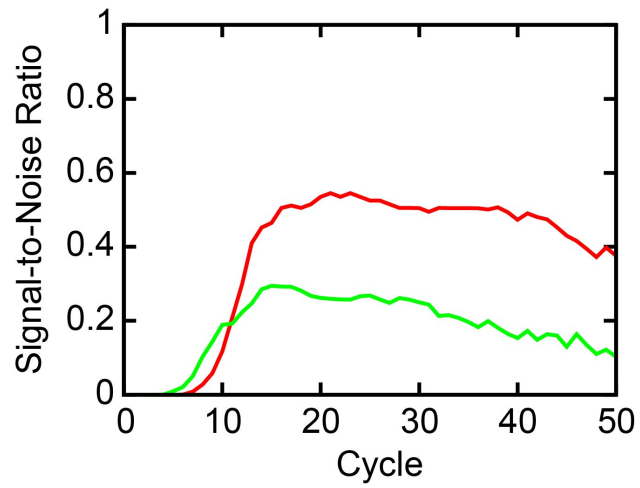

Signal-to-Noise ratio of the trials of SDS starting from the (red) open and (green) closed forms of MBP ( $N_{\text{initial}} = 100$  and  $\text{DOF} = 30$  PCs).

### Supporting Information (Figure S7)

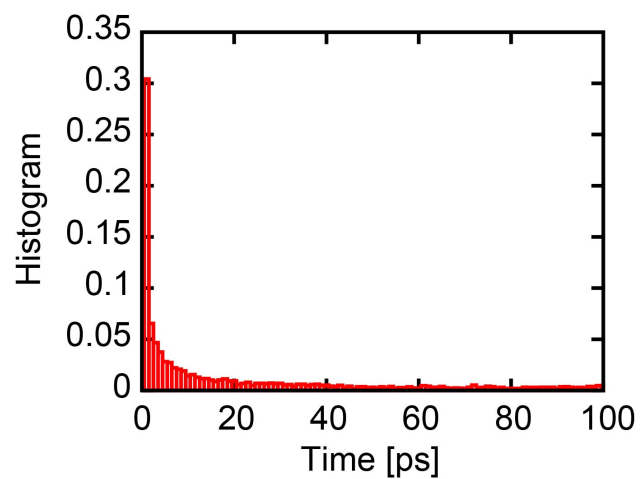

Histogram of snapshots for time at which they were selected as initial structures from the 100-ps MD simulations during the cycles of conformational resampling for the trial of SDS starting from the open form of MBP ( $N_{\text{initial}} = 100$  and DOFs = 30 PCs) during the 50 cycles.



### Supporting Information (Figure S8)

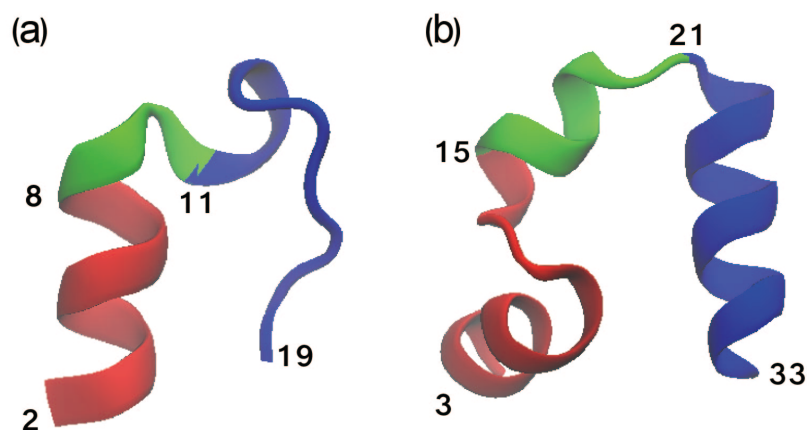

Experimentally determined structures of (a) trp-cage and (b) villin at their native states. Segment1 (red and green regions) consisting of the residues (2-11) for trp-cage and (3-21) for villin, Segment2 (green and blue regions) consisting of the residues (8-19) for trp-cage and (15-33) for villin. The common region between segments1 and segment2 are colored in green.
